# Supplementary material
Source: publisher figshare collection journal article supplement (https://geolsoc.figshare.com/ndownloader/files/35156099)
Supplement: Supplementary file 1 [file 35156099]

## Sheet: Sheet1
Results_export_1	Results_export_2	Results_export_3
Results of Monte Carlo unmixing model
wghtings applied to PDPs and CDFs
number of grains in each trial=	N/A
trials=	10000
percent accepted trials=	1
Cross-correlation cutoff=	0
Kuiper V value cutoff=	1
KS D value cutoff=	1
Cross-correlation	0.708 +/- 0.047				Total Percent Contributions
Sample Names	Relative Contribution	Standard Deviation	Percent		Coahuila	Maya
PC03/Coahuila	0.343996	0.147613	34.4		40.2	59.8
La Joya/Coahuila	0.0576002	0.062674	5.8
Santa Rosa/Maya	0.456038	0.128739	45.6
Baldy Granites/Maya	0.0209573	0.0202251	2.1
Baldy Seds/Maya	0.0750453	0.0761886	7.5
Chicxulub/Maya	0.0230731	0.0236426	2.3
Macal Granites/Maya	0.0232905	0.0218574	2.3
Kuiper V value	0.168 +/- 0.012
Sample Names	Relative Contribution	Standard Deviation			Coahuila	Maya
PC03/Coahuila	0.156771	0.148447	15.7		22	78
La Joya/Coahuila	0.0629207	0.0775733	6.3
Santa Rosa/Maya	0.497833	0.0869068	49.8
Baldy Granites/Maya	0.0226963	0.028875	2.3
Baldy Seds/Maya	0.217424	0.136591	21.7
Chicxulub/Maya	0.0188693	0.022425	1.9
Macal Granites/Maya	0.0234861	0.02823	2.3
KS D value	0.13 +/- 0.015
Sample Names	Relative Contribution	Standard Deviation
PC03/Coahuila	0.267543	0.197357
La Joya/Coahuila	0.0591863	0.0713867
Santa Rosa/Maya	0.384941	0.14167
Baldy Granites/Maya	0.0146393	0.0158774
Baldy Seds/Maya	0.241046	0.20096
Chicxulub/Maya	0.0145292	0.014306
Macal Granites/Maya	0.0181149	0.0182434
